# Supplementary material
Source: PubMed Central journal article supplement (PMC3270934)
Supplement: NIHMS323016-supplement-Supp_Figure_S1.pdf [file NIHMS323016-supplement-Supp_Figure_S1.pdf]

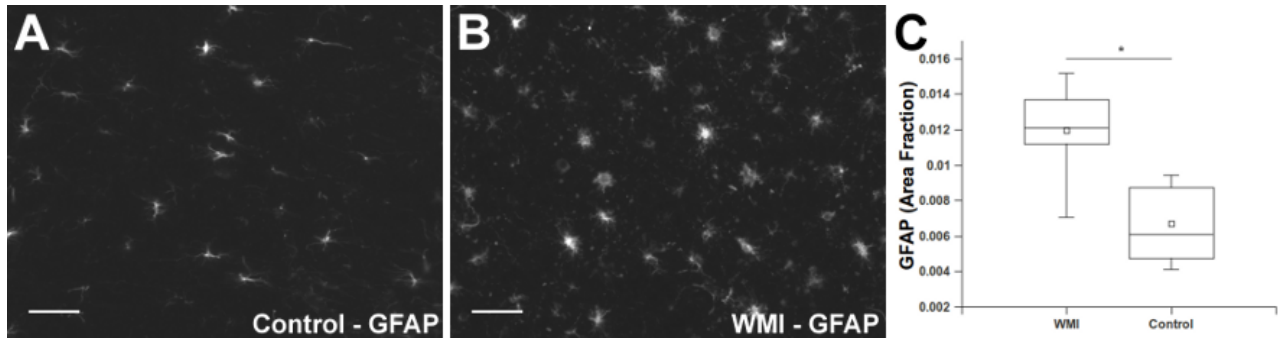

Supplemental Figure 1. Diffuse astroglial reaction in the contemporary cohort of chronic WMI cases defined by astrocyte quantification. (A, B) Typical morphology of GFAP-labeled astrocytes in white matter from control cases (A) differed from WMI cases (B) where astrocytes displayed a hypertrophic-reactive morphology; cases at 29 weeks PCA in A and 32 weeks in B (Table 2). (C) Astroglial quantification identified that WMI cases were significantly elevated relative to control (\* $p=0.001$ ). Scale bars: 25  $\mu\text{m}$ .
