# Supplementary material
Source: PubMed Central journal article supplement (PMC3270934)
Supplement: NIHMS323016-supplement-Supp_Figure_S6.pdf [file NIHMS323016-supplement-Supp_Figure_S6.pdf]

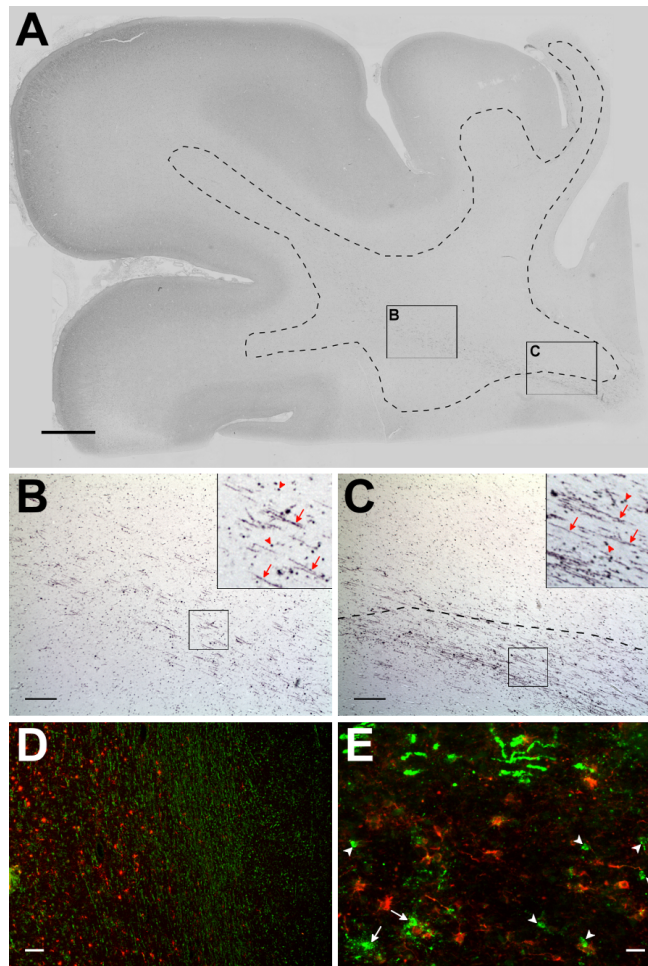

Supplemental Figure 6. Myelination was typically low in WMI cases in regions of diffuse astroglia. (A) Representative low power montage of tissue sections double-stained for Olig2 and MBP staining for myelin, from a WMI case from the retrospective cohort at 38 weeks PCA. Superimposed on the image are the approximate boundaries of diffuse astroglia initially defined by H & E staining and confirmed by quantification of astroglia. (B) Details of MBP staining from inset in A. Sparse myelination (purple, linear structures; red arrows) was seen within the region of diffuse astroglia where numerous Olig2-labeled nuclei (black nuclei, arrowheads) were present. (C) Details of MBP staining from inset in A. The white matter adjacent to the diffuse astroglia was more myelinated (purple, linear structures; red arrows). Olig2-labeled black nuclei are indicated by arrowheads. (D) Representative low power image of deep white matter double-stained for GFAP (red) and MBP (green); case from contemporary cohort at 32 weeks PCA. Extensive myelination of the corpus callosum is seen at right in D, as visualized with the O4 antibody (green). Diffuse reactive astroglia (GFAP-staining; red, left) is present in the white matter but minimally involved the myelinated tract. (E) High-power detail at the edge of the myelinated tract in D (note myelinated axons at top of image). Numerous preOLs (green; arrowheads) and occasional more highly arborized immature OLs (green; arrows) were seen in the region of astroglia (red). Scale bars: A, 2 mm; B, C, 250  $\mu$ m; D, 100  $\mu$ m; E, 25  $\mu$ m.
